# Supplementary material
Source: HighWire-hosted journal article supplement (https://bjsm.bmj.com/content/57/4/237)

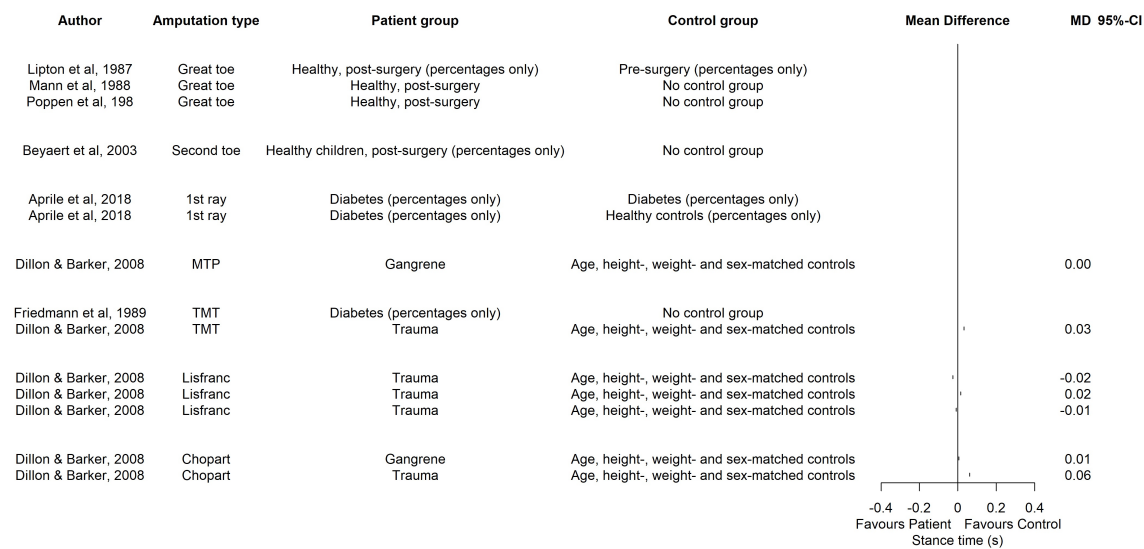

Supplement: inline-supplementary-material-11 [file inline-supplementary-material-11.pdf]

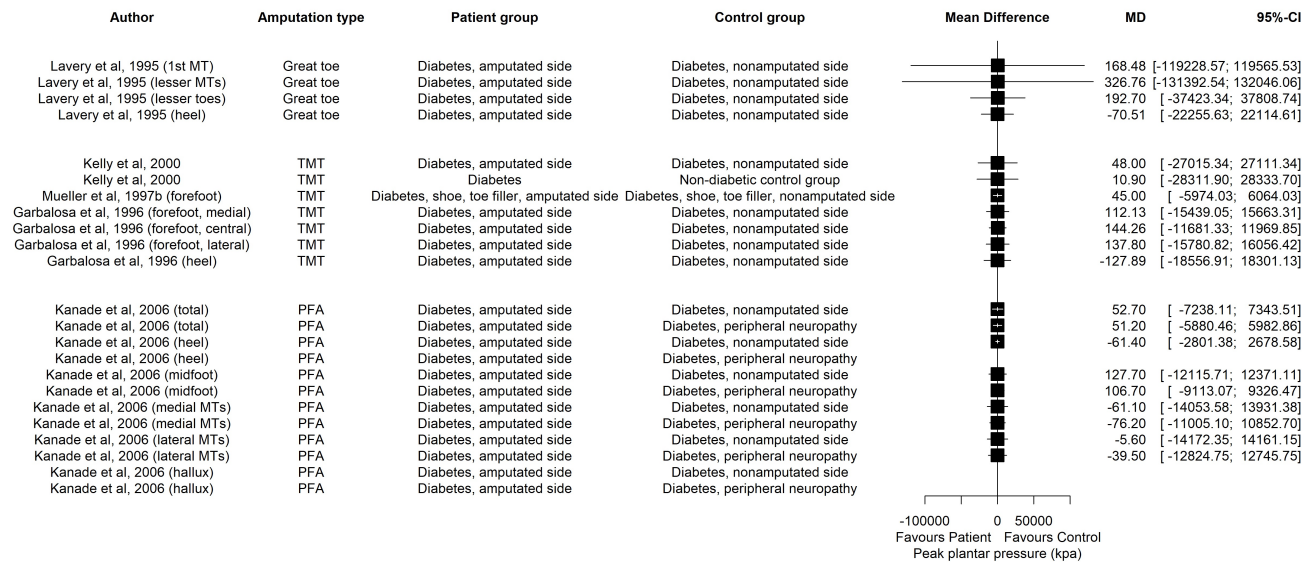

Supplement: inline-supplementary-material-12 [file inline-supplementary-material-12.pdf]

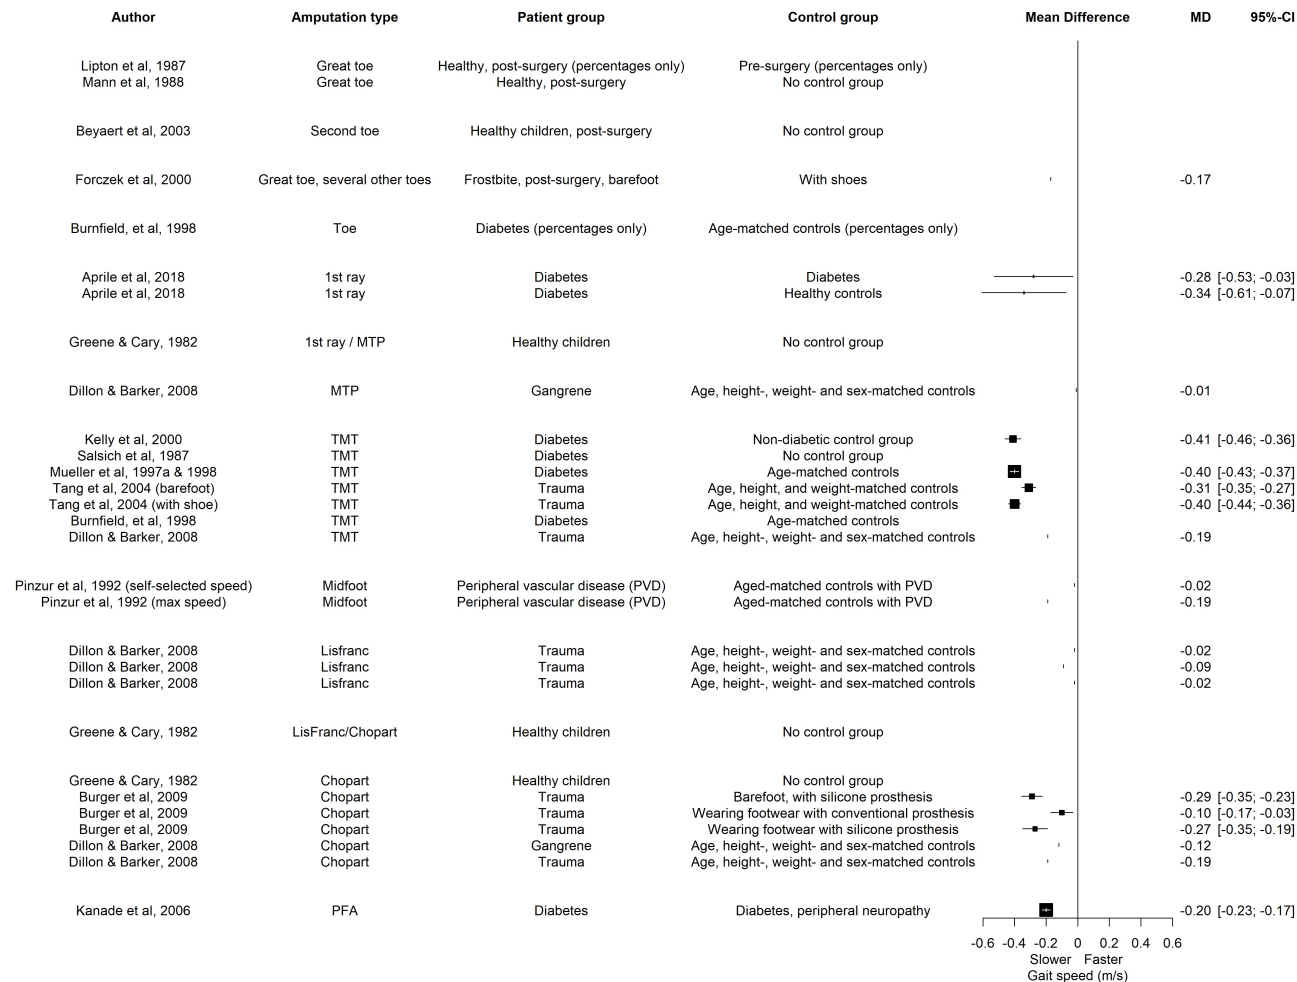

Supplement: inline-supplementary-material-6 [file inline-supplementary-material-6.pdf]

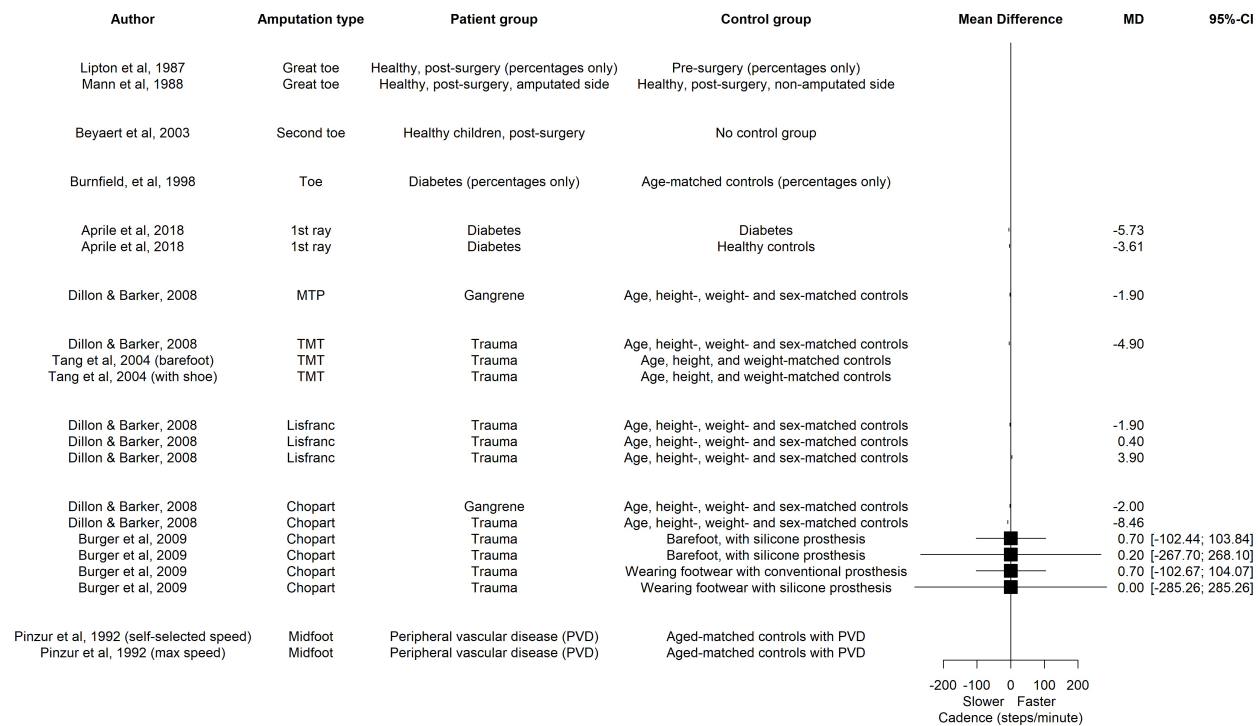

Supplement: inline-supplementary-material-7 [file inline-supplementary-material-7.pdf]

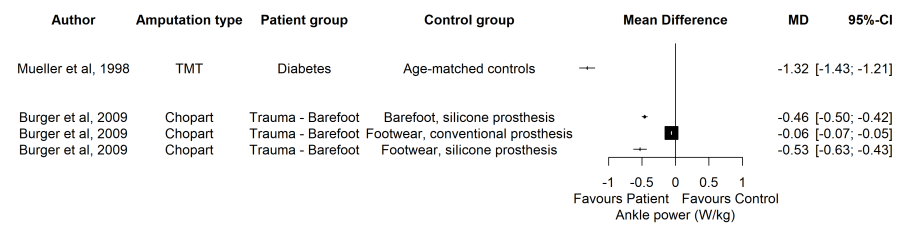

Supplement: inline-supplementary-material-8 [file inline-supplementary-material-8.pdf]
